# Supplementary material for: Reactive force fields for aqueous and interfacial magnesium carbonate formation
Source: Royal Society of Chemistry journal article supplement (doi:10.1039/d1cp02627e), 2021-01-01
Supplement: d1cp02627e1.pdf [file d1cp02627e1.pdf]

```
Reactive MD-force field with Ca and Mg charges fixed to 2- 2021
39      ! Number of general parameters
50.0000 !Overcoordination parameter
9.5469  !Overcoordination parameter
26.5405 !Valency angle conjugation parameter
1.7224  !Triple bond stabilisation parameter
6.8702  !Triple bond stabilisation parameter
60.4850 !C2-correction
1.0588  !Undercoordination parameter
4.6000  !Triple bond stabilisation parameter
12.1176 !Undercoordination parameter
13.3056 !Undercoordination parameter
-55.1978 !Triple bond stabilization energy
0.0000  !Lower Taper-radius
10.0000 !Upper Taper-radius
2.8793  !Not used
33.8667 !Valency undercoordination
6.0891  !Valency angle/lone pair parameter
1.0563  !Valency angle
2.0384  !Valency angle parameter
6.1431  !Not used
6.9290  !Double bond/angle parameter
0.3989  !Double bond/angle parameter: overcoord
3.9954  !Double bond/angle parameter: overcoord
-2.4837 !Not used
5.7796  !Torsion/B0 parameter
10.0000 !Torsion overcoordination
1.9487  !Torsion overcoordination
-1.2327 !Conjugation 0 (not used)
2.1645  !Conjugation
1.5591  !vdWaals shielding
0.1000  !Cutoff for bond order (*100)
2.1365  !Valency angle conjugation parameter
0.6991  !Overcoordination parameter
50.0000 !Overcoordination parameter
1.8512  !Valency/lone pair parameter
0.5000  !Not used
20.0000 !Not used
5.0000  !Molecular energy (not used)
0.0000  !Molecular energy (not used)
2.6962  !Valency angle conjugation parameter
9      ! Nr of atoms; cov.r; valency;a.m;Rvdw;Evdw;gammaEEM;cov.r2;#
      alfa;gammavdW;valency;Eunder;Eover;chiEEM;etaEEM;n.u.
      cov r3;Elp;Heat inc.;n.u.;n.u.;n.u.;n.u.
      ov/un;val1;n.u.;val3,vval4
C      1.3817  4.0000  12.0000  1.8903  0.1838  0.9000  1.1341
4.0000
      9.7559  2.1346  4.0000  34.9350  79.5548  5.9666  7.0000
0.0000
      1.2114  0.0000  202.6057  8.9539  34.9289  13.5366  0.8563
```

|          |         |          |         |          |        |        |         |
|----------|---------|----------|---------|----------|--------|--------|---------|
| 0.0000   |         |          |         |          |        |        |         |
| -2.8983  | 2.5000  | 1.0564   | 4.0000  | 2.9663   | 0.0000 | 0.0000 |         |
| 0.0000   |         |          |         |          |        |        |         |
| H        | 0.8930  | 1.0000   | 1.0080  | 1.3550   | 0.0930 | 0.8203 | -0.1000 |
| 1.0000   |         |          |         |          |        |        |         |
| 8.2230   | 33.2894 | 1.0000   | 0.0000  | 121.1250 | 3.7248 | 9.6093 |         |
| 1.0000   |         |          |         |          |        |        |         |
| -0.1000  | 0.0000  | 61.6606  | 3.0408  | 2.4197   | 0.0003 | 1.0698 |         |
| 0.0000   |         |          |         |          |        |        |         |
| -19.4571 | 4.2733  | 1.0338   | 1.0000  | 2.8793   | 0.0000 | 0.0000 |         |
| 0.0000   |         |          |         |          |        |        |         |
| O        | 1.2450  | 2.0000   | 15.9990 | 2.3890   | 0.1000 | 1.0898 | 1.0548  |
| 6.0000   |         |          |         |          |        |        |         |
| 9.7300   | 13.8449 | 4.0000   | 37.5000 | 116.0768 | 8.5000 | 8.3122 |         |
| 2.0000   |         |          |         |          |        |        |         |
| 0.9049   | 0.4056  | 59.0626  | 3.5027  | 0.7640   | 0.0021 | 0.9745 |         |
| 0.0000   |         |          |         |          |        |        |         |
| -3.5500  | 2.9000  | 1.0493   | 4.0000  | 2.9225   | 0.0000 | 0.0000 |         |
| 0.0000   |         |          |         |          |        |        |         |
| Fe       | 1.9506  | 3.0000   | 55.8450 | 2.0308   | 0.1274 | 0.7264 | -1.0000 |
| 3.0000   |         |          |         |          |        |        |         |
| 11.0534  | 2.2637  | 3.0000   | 0.0000  | 18.3725  | 1.2457 | 7.3021 |         |
| 0.0000   |         |          |         |          |        |        |         |
| -1.2000  | 0.0000  | 66.4838  | 30.0000 | 1.0000   | 0.0000 | 0.8563 |         |
| 0.0000   |         |          |         |          |        |        |         |
| -16.2040 | 2.7917  | 1.0338   | 6.0000  | 2.5791   | 0.0000 | 0.0000 |         |
| 0.0000   |         |          |         |          |        |        |         |
| Cl       | 1.7140  | 1.0000   | 35.4500 | 1.9139   | 0.2000 | 0.3837 | -1.0000 |
| 7.0000   |         |          |         |          |        |        |         |
| 11.5345  | 10.1330 | 1.0000   | 0.0000  | 0.0000   | 9.9614 | 6.5316 |         |
| 0.0000   |         |          |         |          |        |        |         |
| -1.0000  | 3.5750  | 143.1770 | 6.2293  | 5.2294   | 0.1542 | 0.8563 |         |
| 0.0000   |         |          |         |          |        |        |         |
| -10.2080 | 2.9867  | 1.0338   | 6.2998  | 2.5791   | 0.0000 | 0.0000 |         |
| 0.0000   |         |          |         |          |        |        |         |
| Si       | 2.1932  | 4.0000   | 28.0600 | 1.8951   | 0.1737 | 0.8112 | 1.2962  |
| 4.0000   |         |          |         |          |        |        |         |
| 11.3429  | 5.2054  | 4.0000   | 21.7115 | 139.9309 | 4.0081 | 5.7104 |         |
| 0.0000   |         |          |         |          |        |        |         |
| -1.0000  | 0.0000  | 128.2031 | 9.0751  | 23.8188  | 0.8381 | 0.8563 |         |
| 0.0000   |         |          |         |          |        |        |         |
| -4.1684  | 2.0754  | 1.0338   | 4.0000  | 2.5791   | 0.0000 | 0.0000 |         |
| 0.0000   |         |          |         |          |        |        |         |
| Al       | 2.1967  | 3.0000   | 26.9820 | 2.3738   | 0.2328 | 0.4558 | -1.6836 |
| 3.0000   |         |          |         |          |        |        |         |
| 9.4002   | 3.9009  | 3.0000   | 0.0076  | 16.5151  | 1.6032 | 6.7003 |         |
| 0.0000   |         |          |         |          |        |        |         |
| -1.0000  | 0.0000  | 78.4675  | 20.0000 | 0.2500   | 0.0000 | 0.8563 |         |
| 0.0000   |         |          |         |          |        |        |         |
| -23.1826 | 1.5000  | 1.0338   | 8.0000  | 2.5791   | 0.0000 | 0.0000 |         |

|        |                                                                                                |          |          |         |         |        |         |  |
|--------|------------------------------------------------------------------------------------------------|----------|----------|---------|---------|--------|---------|--|
| 0.0000 |                                                                                                |          |          |         |         |        |         |  |
| Ca     | 0.0000                                                                                         | 0.0000   | 40.0870  | 2.7005  | 0.0000  | 0.6000 | 0.0000  |  |
| 0.0000 |                                                                                                |          |          |         |         |        |         |  |
|        | 0.0000                                                                                         | 27.5993  | 0.0000   | 0.0000  | 0.0000  | 0.0000 | 0.0000  |  |
| 0.0000 |                                                                                                |          |          |         |         |        |         |  |
|        | 0.0000                                                                                         | 0.0000   | 220.0000 | 0.0000  | 0.0000  | 0.0000 | 0.0000  |  |
| 0.0000 |                                                                                                |          |          |         |         |        |         |  |
|        | 0.0000                                                                                         | 0.0000   | 1.0564   | 6.2998  | 2.9663  | 0.0000 | 0.0000  |  |
| 0.0000 |                                                                                                |          |          |         |         |        |         |  |
| Mg     | 0.0000                                                                                         | 0.0000   | 24.3050  | 2.2494  | 0.0000  | 0.5536 | 0.0000  |  |
| 0.0000 |                                                                                                |          |          |         |         |        |         |  |
|        | 0.0000                                                                                         | 4.4030   | 0.0000   | 0.0000  | 0.0000  | 0.0000 | 0.0000  |  |
| 0.0000 |                                                                                                |          |          |         |         |        |         |  |
|        | 0.0000                                                                                         | 0.0000   | 23.0445  | 0.0000  | 0.0000  | 0.0000 | 0.0000  |  |
| 0.0000 |                                                                                                |          |          |         |         |        |         |  |
|        | 0.0000                                                                                         | 0.0000   | 1.0564   | 6.2998  | 2.9663  | 0.0000 | 0.0000  |  |
| 0.0000 |                                                                                                |          |          |         |         |        |         |  |
| 23     | ! Nr of bonds; Edis1;LPpen;n.u.;pbe1;pbo5;13corr;pbo6<br>pbe2;pbo3;pbo4;Etrip;pbo1;pbo2;ovcorr |          |          |         |         |        |         |  |
| 1 1    | 158.2004                                                                                       | 99.1897  | 78.0000  | -0.7738 | -0.4550 | 1.0000 | 37.6117 |  |
| 0.4147 |                                                                                                |          |          |         |         |        |         |  |
|        | 0.4590                                                                                         | -0.1000  | 9.1628   | 1.0000  | -0.0777 | 6.7268 | 1.0000  |  |
| 0.0000 |                                                                                                |          |          |         |         |        |         |  |
| 1 2    | 169.4760                                                                                       | 0.0000   | 0.0000   | -0.6083 | 0.0000  | 1.0000 | 6.0000  |  |
| 0.7652 |                                                                                                |          |          |         |         |        |         |  |
|        | 5.2290                                                                                         | 0.0000   | 0.0000   | 1.0000  | -0.0500 | 6.9136 | 0.0000  |  |
| 0.0000 |                                                                                                |          |          |         |         |        |         |  |
| 2 2    | 153.3934                                                                                       | 0.0000   | 0.0000   | -0.4600 | 0.0000  | 1.0000 | 6.0000  |  |
| 0.7300 |                                                                                                |          |          |         |         |        |         |  |
|        | 6.2500                                                                                         | 0.0000   | 0.0000   | 1.0000  | -0.0790 | 6.0552 | 0.0000  |  |
| 0.0000 |                                                                                                |          |          |         |         |        |         |  |
| 1 3    | 158.6946                                                                                       | 107.4583 | 23.3136  | -0.4240 | -0.2029 | 1.0000 | 19.7207 |  |
| 1.0000 |                                                                                                |          |          |         |         |        |         |  |
|        | 0.5322                                                                                         | -0.2871  | 9.2845   | 1.0000  | -0.1406 | 5.6488 | 0.0000  |  |
| 0.0000 |                                                                                                |          |          |         |         |        |         |  |
| 3 3    | 0.0000                                                                                         | 0.0000   | 0.0000   | 0.2506  | -0.1000 | 1.0000 | 29.7503 |  |
| 0.6051 |                                                                                                |          |          |         |         |        |         |  |
|        | 0.3451                                                                                         | -0.1055  | 9.0000   | 1.0000  | -0.1225 | 5.5000 | 1.0000  |  |
| 0.0000 |                                                                                                |          |          |         |         |        |         |  |
| 2 3    | 160.0000                                                                                       | 0.0000   | 0.0000   | -0.5725 | 0.0000  | 1.0000 | 6.0000  |  |
| 0.5626 |                                                                                                |          |          |         |         |        |         |  |
|        | 1.1150                                                                                         | 0.0000   | 0.0000   | 0.0000  | -0.0920 | 4.2790 | 0.0000  |  |
| 0.0000 |                                                                                                |          |          |         |         |        |         |  |
| 1 4    | 133.0514                                                                                       | 0.0000   | 0.0000   | 1.0000  | -0.3000 | 1.0000 | 36.0000 |  |
| 0.0673 |                                                                                                |          |          |         |         |        |         |  |
|        | 0.2350                                                                                         | -0.3500  | 15.0000  | 1.0000  | -0.1143 | 4.5217 | 1.0000  |  |
| 0.0000 |                                                                                                |          |          |         |         |        |         |  |
| 2 4    | 105.0054                                                                                       | 0.0000   | 0.0000   | -0.0717 | 0.0000  | 0.0000 | 6.0000  |  |
| 0.0505 |                                                                                                |          |          |         |         |        |         |  |
|        | 0.1000                                                                                         | 1.0000   | 0.0000   | 1.0000  | -0.1216 | 4.5062 | 0.0000  |  |

|        |          |         |         |         |         |         |         |  |
|--------|----------|---------|---------|---------|---------|---------|---------|--|
| 0.0000 |          |         |         |         |         |         |         |  |
| 3 4    | 65.7713  | 0.0000  | 0.0000  | 0.1366  | -0.3000 | 1.0000  | 36.0000 |  |
| 0.0494 |          |         |         |         |         |         |         |  |
|        | 0.9495   | -0.3500 | 15.0000 | 1.0000  | -0.0555 | 7.9897  | 1.0000  |  |
| 0.0000 |          |         |         |         |         |         |         |  |
| 4 4    | 38.7471  | 0.0000  | 0.0000  | 0.3595  | -0.2000 | 0.0000  | 16.0000 |  |
| 0.2749 |          |         |         |         |         |         |         |  |
|        | 1.0000   | -0.2000 | 15.0000 | 1.0000  | -0.0771 | 6.4477  | 0.0000  |  |
| 0.0000 |          |         |         |         |         |         |         |  |
| 2 5    | 109.1686 | 0.0000  | 0.0000  | -0.1657 | -0.2000 | 0.0000  | 16.0000 |  |
| 1.2500 |          |         |         |         |         |         |         |  |
|        | 2.8463   | -0.2000 | 15.0000 | 1.0000  | -0.1111 | 5.2687  | 0.0000  |  |
| 0.0000 |          |         |         |         |         |         |         |  |
| 3 5    | 0.0000   | 0.0000  | 0.0000  | 0.5000  | -0.2000 | 0.0000  | 16.0000 |  |
| 0.5000 |          |         |         |         |         |         |         |  |
|        | 1.0001   | -0.2000 | 15.0000 | 1.0000  | -0.1000 | 10.0000 | 0.0000  |  |
| 0.0000 |          |         |         |         |         |         |         |  |
| 4 5    | 0.0000   | 0.0000  | 0.0000  | 0.2500  | -0.2000 | 0.0000  | 16.0000 |  |
| 0.5000 |          |         |         |         |         |         |         |  |
|        | 0.5000   | -0.2000 | 15.0000 | 1.0000  | -0.2000 | 10.0000 | 0.0000  |  |
| 0.0000 |          |         |         |         |         |         |         |  |
| 5 5    | 0.2500   | 0.0000  | 0.0000  | 0.1803  | -0.2000 | 0.0000  | 16.0000 |  |
| 0.3356 |          |         |         |         |         |         |         |  |
|        | 0.9228   | -0.2000 | 15.0000 | 1.0000  | -0.1178 | 5.6715  | 0.0000  |  |
| 0.0000 |          |         |         |         |         |         |         |  |
| 1 6    | 0.0000   | 0.0000  | 0.0000  | -0.6528 | -0.3000 | 0.0000  | 36.0000 |  |
| 0.5000 |          |         |         |         |         |         |         |  |
|        | 10.0663  | -0.3500 | 25.0000 | 1.0000  | -0.1000 | 10.0000 | 0.0000  |  |
| 0.0000 |          |         |         |         |         |         |         |  |
| 2 6    | 250.0000 | 0.0000  | 0.0000  | -0.7128 | 0.0000  | 1.0000  | 6.0000  |  |
| 0.1186 |          |         |         |         |         |         |         |  |
|        | 18.5790  | 1.0000  | 0.0000  | 1.0000  | -0.0731 | 7.4983  | 0.0000  |  |
| 0.0000 |          |         |         |         |         |         |         |  |
| 3 6    | 261.9074 | 5.9533  | 0.0000  | -0.6223 | -0.3000 | 1.0000  | 36.0000 |  |
| 0.7275 |          |         |         |         |         |         |         |  |
|        | 10.1541  | -0.2366 | 29.7817 | 1.0000  | -0.1083 | 8.5924  | 6.0658  |  |
| 0.0000 |          |         |         |         |         |         |         |  |
| 6 6    | 70.9120  | 54.0531 | 30.0000 | 0.4931  | -0.3000 | 1.0000  | 16.0000 |  |
| 0.0392 |          |         |         |         |         |         |         |  |
|        | 0.2476   | -0.8055 | 7.1248  | 1.0000  | -0.1009 | 8.7229  | 0.0000  |  |
| 0.0000 |          |         |         |         |         |         |         |  |
| 1 7    | 0.0000   | 0.0000  | 0.0000  | -0.6528 | -0.3000 | 0.0000  | 36.0000 |  |
| 0.5000 |          |         |         |         |         |         |         |  |
|        | 10.0663  | -0.3500 | 25.0000 | 1.0000  | -0.1000 | 10.0000 | 0.0000  |  |
| 0.0000 |          |         |         |         |         |         |         |  |
| 2 7    | 92.8579  | 0.0000  | 0.0000  | -0.6528 | -0.3000 | 0.0000  | 36.0000 |  |
| 0.1551 |          |         |         |         |         |         |         |  |
|        | 10.0663  | -0.3500 | 25.0000 | 1.0000  | -0.0842 | 7.1758  | 0.0000  |  |
| 0.0000 |          |         |         |         |         |         |         |  |
| 3 7    | 228.4876 | 0.0000  | 0.0000  | -0.8524 | -0.3000 | 0.0000  | 36.0000 |  |

|        |   |                                                            |         |         |         |          |         |          |
|--------|---|------------------------------------------------------------|---------|---------|---------|----------|---------|----------|
| 0.1252 |   |                                                            |         |         |         |          |         |          |
|        |   | 0.4016                                                     | -0.3500 | 25.0000 | 1.0000  | -0.1750  | 5.2102  | 0.0000   |
| 0.0000 |   |                                                            |         |         |         |          |         |          |
| 6      | 7 | 0.0000                                                     | 0.0000  | 0.0000  | 1.0000  | 0.3000   | 0.0000  | 26.0000  |
| 1.0000 |   |                                                            |         |         |         |          |         |          |
|        |   | 0.5000                                                     | 0.0000  | 12.0000 | 1.0000  | -0.2000  | 10.0000 | 0.0000   |
| 0.0000 |   |                                                            |         |         |         |          |         |          |
| 7      | 7 | 34.0777                                                    | 0.0000  | 0.0000  | 0.4832  | -0.3000  | 0.0000  | 16.0000  |
| 0.5154 |   |                                                            |         |         |         |          |         |          |
|        |   | 6.4631                                                     | -0.4197 | 14.3085 | 1.0000  | -0.1463  | 6.1608  | 0.0000   |
| 0.0000 |   |                                                            |         |         |         |          |         |          |
| 16     |   | ! Nr of off-diagonal terms; Ediss;Ro;gamma;rsigma;rpi;rpi2 |         |         |         |          |         |          |
| 1      | 2 | 0.1239                                                     | 1.4004  | 9.8467  | 1.1210  | -1.0000  | -1.0000 |          |
| 2      | 3 | 0.0283                                                     | 1.2885  | 10.9190 | 0.9215  | -1.0000  | -1.0000 |          |
| 1      | 3 | 0.1156                                                     | 1.8520  | 9.8317  | 1.2854  | 1.1352   | 1.0706  |          |
| 1      | 4 | 0.1358                                                     | 1.8293  | 10.0425 | 1.6096  | -1.0000  | -1.0000 |          |
| 2      | 4 | 0.0640                                                     | 1.6974  | 11.5167 | 1.3517  | -1.0000  | -1.0000 |          |
| 3      | 4 | 0.0846                                                     | 1.4284  | 10.0808 | 1.8339  | -1.0000  | -1.0000 |          |
| 2      | 5 | 0.0568                                                     | 1.6740  | 9.6297  | 1.2200  | -1.0000  | -1.0000 |          |
| 3      | 5 | 0.1927                                                     | 2.2551  | 11.2308 | -1.0000 | -1.0000  | -1.0000 |          |
| 4      | 5 | 0.1500                                                     | 2.1500  | 11.0000 | -1.0000 | -1.0000  | -1.0000 |          |
| 1      | 6 | 0.2000                                                     | 1.9000  | 12.0000 | -1.0000 | -1.0000  | -1.0000 |          |
| 2      | 6 | 0.2000                                                     | 1.5207  | 12.9535 | 1.2125  | -1.0000  | -1.0000 |          |
| 3      | 6 | 0.2000                                                     | 1.9048  | 10.8374 | 1.7163  | 1.2444   | -1.0000 |          |
| 1      | 7 | 0.2000                                                     | 1.9000  | 12.0000 | -1.0000 | -1.0000  | -1.0000 |          |
| 2      | 7 | 0.0564                                                     | 1.4937  | 12.0744 | 1.7276  | -1.0000  | -1.0000 |          |
| 3      | 7 | 0.1651                                                     | 1.8998  | 11.2212 | 1.5416  | -1.0000  | -1.0000 |          |
| 6      | 7 | 0.0216                                                     | 1.5025  | 11.8792 | -1.0000 | -1.0000  | -1.0000 |          |
| 64     |   | ! Nr of angles;at1;at2;at3;Theta,o;ka;kb;pv1;pv2           |         |         |         |          |         |          |
| 1      | 1 | 1                                                          | 59.0573 | 30.7029 | 0.7606  | 0.0000   | 0.7180  | 6.2933   |
| 1.1244 |   |                                                            |         |         |         |          |         |          |
| 1      | 1 | 2                                                          | 65.7758 | 14.5234 | 6.2481  | 0.0000   | 0.5665  | 0.0000   |
| 1.6255 |   |                                                            |         |         |         |          |         |          |
| 2      | 1 | 2                                                          | 70.2607 | 25.2202 | 3.7312  | 0.0000   | 0.0050  | 0.0000   |
| 2.7500 |   |                                                            |         |         |         |          |         |          |
| 1      | 2 | 2                                                          | 0.0000  | 0.0000  | 6.0000  | 0.0000   | 0.0000  | 0.0000   |
| 1.0400 |   |                                                            |         |         |         |          |         |          |
| 1      | 2 | 1                                                          | 0.0000  | 3.4110  | 7.7350  | 0.0000   | 0.0000  | 0.0000   |
| 1.0400 |   |                                                            |         |         |         |          |         |          |
| 2      | 2 | 2                                                          | 0.0000  | 27.9213 | 5.8635  | 0.0000   | 0.0000  | 0.0000   |
| 1.0400 |   |                                                            |         |         |         |          |         |          |
| 1      | 1 | 3                                                          | 49.6811 | 7.1713  | 4.3889  | 0.0000   | 0.7171  | 10.2661  |
| 1.0463 |   |                                                            |         |         |         |          |         |          |
| 3      | 1 | 3                                                          | 77.7473 | 40.1718 | 2.9802  | -25.3063 | 1.6170  | -46.1315 |
| 2.2503 |   |                                                            |         |         |         |          |         |          |
| 2      | 1 | 3                                                          | 65.0000 | 13.8815 | 5.0583  | 0.0000   | 0.4985  | 0.0000   |
| 1.4900 |   |                                                            |         |         |         |          |         |          |
| 1      | 3 | 1                                                          | 73.5312 | 44.7275 | 0.7354  | 0.0000   | 3.0000  | 0.0000   |
| 1.0684 |   |                                                            |         |         |         |          |         |          |
| 1      | 3 | 3                                                          | 79.4761 | 36.3701 | 1.8943  | 0.0000   | 0.7351  | 67.6777  |

|        |   |   |          |         |         |        |        |         |  |
|--------|---|---|----------|---------|---------|--------|--------|---------|--|
| 3.0000 |   |   |          |         |         |        |        |         |  |
| 3      | 3 | 3 | 80.7324  | 30.4554 | 0.9953  | 0.0000 | 1.6310 | 50.0000 |  |
| 1.0783 |   |   |          |         |         |        |        |         |  |
| 1      | 3 | 2 | 70.1880  | 20.9562 | 0.3864  | 0.0000 | 0.0050 | 0.0000  |  |
| 1.6924 |   |   |          |         |         |        |        |         |  |
| 2      | 3 | 3 | 75.6935  | 50.0000 | 2.0000  | 0.0000 | 1.0000 | 0.0000  |  |
| 1.1680 |   |   |          |         |         |        |        |         |  |
| 2      | 3 | 2 | 85.8000  | 9.8453  | 2.2720  | 0.0000 | 2.8635 | 0.0000  |  |
| 1.5800 |   |   |          |         |         |        |        |         |  |
| 1      | 2 | 3 | 0.0000   | 25.0000 | 3.0000  | 0.0000 | 1.0000 | 0.0000  |  |
| 1.0400 |   |   |          |         |         |        |        |         |  |
| 3      | 2 | 3 | 0.0000   | 15.0000 | 2.8900  | 0.0000 | 0.0000 | 0.0000  |  |
| 2.8774 |   |   |          |         |         |        |        |         |  |
| 2      | 2 | 3 | 0.0000   | 8.5744  | 3.0000  | 0.0000 | 0.0000 | 0.0000  |  |
| 1.0421 |   |   |          |         |         |        |        |         |  |
| 1      | 4 | 1 | 29.1655  | 3.3035  | 0.2000  | 0.0000 | 1.1221 | 0.0000  |  |
| 1.0562 |   |   |          |         |         |        |        |         |  |
| 1      | 1 | 4 | 59.8697  | 2.8115  | 1.9262  | 0.0000 | 0.7602 | 0.0000  |  |
| 1.4056 |   |   |          |         |         |        |        |         |  |
| 1      | 4 | 4 | 25.4591  | 15.9430 | 0.9664  | 0.0000 | 2.2242 | 0.0000  |  |
| 1.1088 |   |   |          |         |         |        |        |         |  |
| 4      | 1 | 4 | 88.6279  | 26.0015 | 1.0328  | 0.0000 | 0.2361 | 0.0000  |  |
| 2.0576 |   |   |          |         |         |        |        |         |  |
| 2      | 1 | 4 | 47.3695  | 16.9204 | 4.1052  | 0.0000 | 0.1000 | 0.0000  |  |
| 1.0050 |   |   |          |         |         |        |        |         |  |
| 2      | 4 | 2 | 34.1965  | 6.6782  | 6.5943  | 0.0000 | 1.3895 | 0.0000  |  |
| 1.5365 |   |   |          |         |         |        |        |         |  |
| 2      | 2 | 4 | 0.1000   | 30.0000 | 3.4094  | 0.0000 | 2.4379 | 0.0000  |  |
| 1.5166 |   |   |          |         |         |        |        |         |  |
| 4      | 2 | 4 | 0.0000   | 8.2994  | 5.7832  | 0.0000 | 2.9873 | 0.0000  |  |
| 1.7716 |   |   |          |         |         |        |        |         |  |
| 2      | 4 | 4 | 21.2590  | 6.5954  | 0.9951  | 0.0000 | 2.8006 | 0.0000  |  |
| 1.0000 |   |   |          |         |         |        |        |         |  |
| 2      | 4 | 4 | 180.0000 | -6.9970 | 24.3956 | 0.0000 | 0.7878 | 0.0000  |  |
| 1.3672 |   |   |          |         |         |        |        |         |  |
| 1      | 3 | 4 | 90.0000  | 12.8684 | 1.4601  | 0.0000 | 0.8757 | 0.0000  |  |
| 1.0000 |   |   |          |         |         |        |        |         |  |
| 3      | 1 | 4 | 18.8567  | 24.3753 | 3.9647  | 0.0000 | 0.1000 | 0.0000  |  |
| 1.5314 |   |   |          |         |         |        |        |         |  |
| 3      | 4 | 3 | 79.7335  | 0.0100  | 0.1392  | 0.0000 | 0.4968 | 0.0000  |  |
| 2.1948 |   |   |          |         |         |        |        |         |  |
| 4      | 3 | 4 | 57.6787  | 4.8566  | 2.5768  | 0.0000 | 0.7552 | 0.0000  |  |
| 1.0000 |   |   |          |         |         |        |        |         |  |
| 2      | 3 | 4 | 59.4556  | 10.2025 | 0.7481  | 0.0000 | 1.4521 | 0.0000  |  |
| 1.0000 |   |   |          |         |         |        |        |         |  |
| 3      | 3 | 4 | 73.6721  | 32.6330 | 1.7223  | 0.0000 | 1.0221 | 0.0000  |  |
| 1.4351 |   |   |          |         |         |        |        |         |  |
| 3      | 4 | 4 | 65.7545  | 5.6268  | 4.0645  | 0.0000 | 1.7794 | 0.0000  |  |
| 2.6730 |   |   |          |         |         |        |        |         |  |
| 3      | 2 | 4 | 0.0000   | 4.6026  | 2.5343  | 0.0000 | 0.7284 | 0.0000  |  |

|        |   |   |          |          |        |        |        |        |  |
|--------|---|---|----------|----------|--------|--------|--------|--------|--|
| 1.1051 |   |   |          |          |        |        |        |        |  |
| 2      | 4 | 3 | 34.0653  | 20.1868  | 4.7461 | 0.0000 | 0.1000 | 0.0000 |  |
| 1.6752 |   |   |          |          |        |        |        |        |  |
| 3      | 2 | 5 | 0.0000   | 0.0100   | 0.5211 | 0.0000 | 0.0000 | 0.0000 |  |
| 1.3859 |   |   |          |          |        |        |        |        |  |
| 6      | 6 | 6 | 78.5339  | 36.4328  | 1.0067 | 0.0000 | 0.1694 | 0.0000 |  |
| 1.6608 |   |   |          |          |        |        |        |        |  |
| 2      | 6 | 6 | 77.2616  | 5.0190   | 7.8944 | 0.0000 | 4.0000 | 0.0000 |  |
| 1.0400 |   |   |          |          |        |        |        |        |  |
| 2      | 6 | 2 | 75.7983  | 14.4132  | 2.8640 | 0.0000 | 4.0000 | 0.0000 |  |
| 1.0400 |   |   |          |          |        |        |        |        |  |
| 3      | 6 | 6 | 90.6812  | 31.1846  | 4.4543 | 0.0000 | 0.5073 | 0.0000 |  |
| 2.1809 |   |   |          |          |        |        |        |        |  |
| 2      | 6 | 3 | 73.6998  | 40.0000  | 1.8782 | 0.0000 | 4.0000 | 0.0000 |  |
| 1.1290 |   |   |          |          |        |        |        |        |  |
| 3      | 6 | 3 | 80.1361  | 36.2368  | 0.9504 | 0.0000 | 0.2624 | 0.0000 |  |
| 2.0787 |   |   |          |          |        |        |        |        |  |
| 6      | 3 | 6 | 80.4450  | 6.0739   | 1.7731 | 0.0000 | 3.2548 | 0.0000 |  |
| 1.0422 |   |   |          |          |        |        |        |        |  |
| 2      | 3 | 6 | 86.7611  | 7.1742   | 1.4013 | 0.0000 | 1.4999 | 0.0000 |  |
| 1.0400 |   |   |          |          |        |        |        |        |  |
| 3      | 3 | 6 | 103.4529 | 26.9589  | 1.3470 | 0.0000 | 1.7728 | 0.0000 |  |
| 1.3091 |   |   |          |          |        |        |        |        |  |
| 2      | 2 | 6 | 0.0000   | 47.1300  | 6.0000 | 0.0000 | 1.6371 | 0.0000 |  |
| 1.0400 |   |   |          |          |        |        |        |        |  |
| 6      | 2 | 6 | 0.0000   | 27.4206  | 6.0000 | 0.0000 | 1.6371 | 0.0000 |  |
| 1.0400 |   |   |          |          |        |        |        |        |  |
| 3      | 2 | 6 | 0.0000   | 5.0000   | 1.0000 | 0.0000 | 1.0000 | 0.0000 |  |
| 1.2500 |   |   |          |          |        |        |        |        |  |
| 3      | 2 | 7 | 0.0000   | 4.2750   | 1.0250 | 0.0000 | 1.3750 | 0.0000 |  |
| 1.4750 |   |   |          |          |        |        |        |        |  |
| 2      | 2 | 7 | 0.0000   | 3.0000   | 1.0000 | 0.0000 | 1.0000 | 0.0000 |  |
| 1.2500 |   |   |          |          |        |        |        |        |  |
| 7      | 2 | 7 | 0.0000   | 20.2391  | 0.1328 | 0.0000 | 2.9860 | 0.0000 |  |
| 1.0870 |   |   |          |          |        |        |        |        |  |
| 2      | 3 | 7 | 88.1144  | 13.2143  | 1.5068 | 0.0000 | 3.0000 | 0.0000 |  |
| 1.0100 |   |   |          |          |        |        |        |        |  |
| 3      | 3 | 7 | 34.4326  | 25.9544  | 5.1239 | 0.0000 | 2.7500 | 0.0000 |  |
| 1.7141 |   |   |          |          |        |        |        |        |  |
| 7      | 3 | 7 | 21.6945  | 20.0000  | 4.0000 | 0.0000 | 0.6619 | 0.0000 |  |
| 1.9714 |   |   |          |          |        |        |        |        |  |
| 2      | 7 | 2 | 67.4229  | 4.5148   | 5.9702 | 0.0000 | 3.0000 | 0.0000 |  |
| 2.6879 |   |   |          |          |        |        |        |        |  |
| 2      | 7 | 3 | 41.8108  | 17.3800  | 2.6618 | 0.0000 | 0.7372 | 0.0000 |  |
| 1.0100 |   |   |          |          |        |        |        |        |  |
| 3      | 7 | 3 | 49.1145  | 11.8902  | 2.1383 | 0.0000 | 3.0000 | 0.0000 |  |
| 1.4790 |   |   |          |          |        |        |        |        |  |
| 2      | 7 | 7 | 180.0000 | -26.7860 | 7.3549 | 0.0000 | 1.0000 | 0.0000 |  |
| 1.0252 |   |   |          |          |        |        |        |        |  |
| 2      | 7 | 7 | 78.2279  | 37.6504  | 0.4809 | 0.0000 | 1.0000 | 0.0000 |  |

```

2.9475
 6 3 7 16.5023  0.0100  2.7027  0.0000  1.0000  0.0000
1.0000
 3 6 7 88.2703  0.3954  0.2500  0.0000  0.5000  0.0000
2.1060
 3 7 6 83.8306  0.3712  0.2500  0.0000  0.5000  0.0000
2.1153
32 ! Nr of torsions;at1;at2;at3;at4;;V1;V2;V3;V2(B0);vconj;n.u;n
 1 1 1 1 -0.2500 34.7453  0.0288 -6.3507 -1.6000  0.0000
0.0000
 1 1 1 2 -0.2500 29.2131  0.2945 -4.9581 -2.1802  0.0000
0.0000
 2 1 1 2 -0.2500 31.2081  0.4539 -4.8923 -2.2677  0.0000
0.0000
 1 1 1 3 -0.3495 22.2142 -0.2959 -2.5000 -1.9066  0.0000
0.0000
 2 1 1 3  0.0646 24.3195  0.6259 -3.9603 -1.0000  0.0000
0.0000
 3 1 1 3 -0.5456  5.5756  0.8433 -5.1924 -1.0180  0.0000
0.0000
 1 1 3 1  1.7555 27.9267  0.0072 -2.6533 -1.0000  0.0000
0.0000
 1 1 3 2 -1.4358 36.7830 -1.0000 -8.1821 -1.0000  0.0000
0.0000
 2 1 3 1 -1.3959 34.5053  0.7200 -2.5714 -2.1641  0.0000
0.0000
 2 1 3 2 -2.5000 70.0597  1.0000 -3.5539 -2.9929  0.0000
0.0000
 1 1 3 3  0.6852 11.2819 -0.4784 -2.5000 -2.1085  0.0000
0.0000
 2 1 3 3  0.1933 80.0000  1.0000 -4.0590 -3.0000  0.0000
0.0000
 3 1 3 1 -1.9889 76.4820 -0.1796 -3.8301 -3.0000  0.0000
0.0000
 3 1 3 2  0.2160 72.7707 -0.7087 -4.2100 -3.0000  0.0000
0.0000
 3 1 3 3 -2.5000 71.0772  0.2542 -3.1631 -3.0000  0.0000
0.0000
 1 3 3 1  2.5000 -0.6002  1.0000 -3.4297 -2.8858  0.0000
0.0000
 1 3 3 2 -2.5000 -3.3822  0.7004 -5.4467 -2.9586  0.0000
0.0000
 2 3 3 2  2.5000 -4.0000  0.9000 -2.5000 -1.0000  0.0000
0.0000
 1 3 3 3  1.2329 -4.0000  1.0000 -2.5000 -1.7479  0.0000
0.0000
 2 3 3 3  0.8302 -4.0000 -0.7763 -2.5000 -1.0000  0.0000
0.0000
 3 3 3 3 -2.5000 -4.0000  1.0000 -2.5000 -1.0000  0.0000
0.0000

```

|        |                                                  |   |        |         |         |         |         |         |        |
|--------|--------------------------------------------------|---|--------|---------|---------|---------|---------|---------|--------|
| 0      | 1                                                | 2 | 0      | 0.0000  | 0.0000  | 0.0000  | 0.0000  | 0.0000  | 0.0000 |
| 0.0000 |                                                  |   |        |         |         |         |         |         |        |
| 0      | 2                                                | 2 | 0      | 0.0000  | 0.0000  | 0.0000  | 0.0000  | 0.0000  | 0.0000 |
| 0.0000 |                                                  |   |        |         |         |         |         |         |        |
| 0      | 2                                                | 3 | 0      | 0.0000  | 0.1000  | 0.0200  | -2.5415 | 0.0000  | 0.0000 |
| 0.0000 |                                                  |   |        |         |         |         |         |         |        |
| 0      | 1                                                | 1 | 0      | 0.0000  | 50.0000 | 0.3000  | -4.0000 | -2.0000 | 0.0000 |
| 0.0000 |                                                  |   |        |         |         |         |         |         |        |
| 0      | 3                                                | 3 | 0      | 0.5511  | 25.4150 | 1.1330  | -5.1903 | -1.0000 | 0.0000 |
| 0.0000 |                                                  |   |        |         |         |         |         |         |        |
| 1      | 1                                                | 3 | 3      | -2.0000 | 73.0530 | 1.5000  | -9.0000 | -2.0000 | 0.0000 |
| 0.0000 |                                                  |   |        |         |         |         |         |         |        |
| 1      | 3                                                | 3 | 1      | 0.0002  | 80.0000 | -1.5000 | -2.5000 | -2.0000 | 0.0000 |
| 0.0000 |                                                  |   |        |         |         |         |         |         |        |
| 3      | 1                                                | 3 | 3      | -1.8835 | 20.0000 | 1.5000  | -9.0000 | -2.0000 | 0.0000 |
| 0.0000 |                                                  |   |        |         |         |         |         |         |        |
| 2      | 6                                                | 6 | 2      | 0.0000  | 0.0000  | 0.0640  | -2.4426 | 0.0000  | 0.0000 |
| 0.0000 |                                                  |   |        |         |         |         |         |         |        |
| 2      | 6                                                | 6 | 6      | 0.0000  | 0.0000  | 0.1587  | -2.4426 | 0.0000  | 0.0000 |
| 0.0000 |                                                  |   |        |         |         |         |         |         |        |
| 0      | 2                                                | 6 | 0      | 0.0000  | 0.0000  | 0.1200  | -2.4847 | 0.0000  | 0.0000 |
| 0.0000 |                                                  |   |        |         |         |         |         |         |        |
| 1      | ! Nr of hydrogen bonds;at1;at2;at3;Rhb;Dehb;vhb1 |   |        |         |         |         |         |         |        |
| 3      | 2                                                | 3 | 2.1200 | -3.5800 | 1.4500  | 19.5000 |         |         |        |
