# Supplementary material for: Reactive force fields for aqueous and interfacial magnesium carbonate formation
Source: Royal Society of Chemistry journal article supplement (doi:10.1039/d1cp02627e), 2021-01-01
Supplement: d1cp02627e2.pdf [file d1cp02627e2.pdf]

Reactive MD-force field with Ca and Mg charges fixed to 2 and 1.28 respectively -2021

```
39      ! Number of general parameters
50.0000 !Overcoordination parameter
 9.5469 !Overcoordination parameter
26.5405 !Valency angle conjugation parameter
 1.7224 !Triple bond stabilisation parameter
 6.8702 !Triple bond stabilisation parameter
60.4850 !C2-correction
 1.0588 !Undercoordination parameter
 4.6000 !Triple bond stabilisation parameter
12.1176 !Undercoordination parameter
13.3056 !Undercoordination parameter
-55.1978 !Triple bond stabilization energy
 0.0000 !Lower Taper-radius
10.0000 !Upper Taper-radius
 2.8793 !Not used
33.8667 !Valency undercoordination
 6.0891 !Valency angle/lone pair parameter
 1.0563 !Valency angle
 2.0384 !Valency angle parameter
 6.1431 !Not used
 6.9290 !Double bond/angle parameter
 0.3989 !Double bond/angle parameter: overcoord
 3.9954 !Double bond/angle parameter: overcoord
-2.4837 !Not used
 5.7796 !Torsion/B0 parameter
10.0000 !Torsion overcoordination
 1.9487 !Torsion overcoordination
-1.2327 !Conjugation 0 (not used)
 2.1645 !Conjugation
 1.5591 !vdWaals shielding
 0.1000 !Cutoff for bond order (*100)
 2.1365 !Valency angle conjugation parameter
 0.6991 !Overcoordination parameter
50.0000 !Overcoordination parameter
 1.8512 !Valency/lone pair parameter
 0.5000 !Not used
20.0000 !Not used
 5.0000 !Molecular energy (not used)
 0.0000 !Molecular energy (not used)
 2.6962 !Valency angle conjugation parameter
9      ! Nr of atoms; cov.r; valency;a.m;Rvdw;Evdw;gammaEEM;cov.r2;#
      alfa;gammavdW;valency;Eunder;Eover;chiEEM;etaEEM;n.u.
      cov r3;Elp;Heat inc.;n.u.;n.u.;n.u.;n.u.
      ov/un;val1;n.u.;val3,vval4
C      1.3817  4.0000  12.0000  1.8903  0.1838  0.9000  1.1341
4.0000
      9.7559  2.1346  4.0000  34.9350  79.5548  5.9666  7.0000
0.0000
```

|        |         |          |          |          |         |          |        |
|--------|---------|----------|----------|----------|---------|----------|--------|
| 0.0000 | 1.2114  | 0.0000   | 202.6057 | 8.9539   | 34.9289 | 13.5366  | 0.8563 |
| 0.0000 | -2.8983 | 2.5000   | 1.0564   | 4.0000   | 2.9663  | 0.0000   | 0.0000 |
| 1.0000 | H       | 0.8930   | 1.0000   | 1.0080   | 1.3550  | 0.0930   | 0.8203 |
| 1.0000 |         | 8.2230   | 33.2894  | 1.0000   | 0.0000  | 121.1250 | 3.7248 |
| 0.0000 |         | -0.1000  | 0.0000   | 61.6606  | 3.0408  | 2.4197   | 0.0003 |
| 0.0000 |         | -19.4571 | 4.2733   | 1.0338   | 1.0000  | 2.8793   | 0.0000 |
| 6.0000 | 0       | 1.2450   | 2.0000   | 15.9990  | 2.3890  | 0.1000   | 1.0898 |
| 2.0000 |         | 9.7300   | 13.8449  | 4.0000   | 37.5000 | 116.0768 | 8.5000 |
| 0.0000 |         | 0.9049   | 0.4056   | 59.0626  | 3.5027  | 0.7640   | 0.0021 |
| 0.0000 |         | -3.5500  | 2.9000   | 1.0493   | 4.0000  | 2.9225   | 0.0000 |
| 3.0000 | Fe      | 1.9506   | 3.0000   | 55.8450  | 2.0308  | 0.1274   | 0.7264 |
| 0.0000 |         | 11.0534  | 2.2637   | 3.0000   | 0.0000  | 18.3725  | 1.2457 |
| 0.0000 |         | -1.2000  | 0.0000   | 66.4838  | 30.0000 | 1.0000   | 0.0000 |
| 0.0000 |         | -16.2040 | 2.7917   | 1.0338   | 6.0000  | 2.5791   | 0.0000 |
| 7.0000 | Cl      | 1.7140   | 1.0000   | 35.4500  | 1.9139  | 0.2000   | 0.3837 |
| 0.0000 |         | 11.5345  | 10.1330  | 1.0000   | 0.0000  | 0.0000   | 9.9614 |
| 0.0000 |         | -1.0000  | 3.5750   | 143.1770 | 6.2293  | 5.2294   | 0.1542 |
| 0.0000 |         | -10.2080 | 2.9867   | 1.0338   | 6.2998  | 2.5791   | 0.0000 |
| 4.0000 | Si      | 2.1932   | 4.0000   | 28.0600  | 1.8951  | 0.1737   | 0.8112 |
| 0.0000 |         | 11.3429  | 5.2054   | 4.0000   | 21.7115 | 139.9309 | 4.0081 |
| 0.0000 |         | -1.0000  | 0.0000   | 128.2031 | 9.0751  | 23.8188  | 0.8381 |
| 0.0000 |         | -4.1684  | 2.0754   | 1.0338   | 4.0000  | 2.5791   | 0.0000 |
| 3.0000 | Al      | 2.1967   | 3.0000   | 26.9820  | 2.3738  | 0.2328   | 0.4558 |
| 0.0000 |         | 9.4002   | 3.9009   | 3.0000   | 0.0076  | 16.5151  | 1.6032 |
| 0.0000 |         | -1.0000  | 0.0000   | 78.4675  | 20.0000 | 0.2500   | 0.0000 |



|        |     |          |         |         |         |         |         |         |
|--------|-----|----------|---------|---------|---------|---------|---------|---------|
| 0.0000 |     | 0.1000   | 1.0000  | 0.0000  | 1.0000  | -0.1216 | 4.5062  | 0.0000  |
| 0.0494 | 3 4 | 65.7713  | 0.0000  | 0.0000  | 0.1366  | -0.3000 | 1.0000  | 36.0000 |
| 0.0000 |     | 0.9495   | -0.3500 | 15.0000 | 1.0000  | -0.0555 | 7.9897  | 1.0000  |
| 0.2749 | 4 4 | 38.7471  | 0.0000  | 0.0000  | 0.3595  | -0.2000 | 0.0000  | 16.0000 |
| 0.0000 |     | 1.0000   | -0.2000 | 15.0000 | 1.0000  | -0.0771 | 6.4477  | 0.0000  |
| 1.2500 | 2 5 | 109.1686 | 0.0000  | 0.0000  | -0.1657 | -0.2000 | 0.0000  | 16.0000 |
| 0.0000 |     | 2.8463   | -0.2000 | 15.0000 | 1.0000  | -0.1111 | 5.2687  | 0.0000  |
| 0.5000 | 3 5 | 0.0000   | 0.0000  | 0.0000  | 0.5000  | -0.2000 | 0.0000  | 16.0000 |
| 0.0000 |     | 1.0001   | -0.2000 | 15.0000 | 1.0000  | -0.1000 | 10.0000 | 0.0000  |
| 0.5000 | 4 5 | 0.0000   | 0.0000  | 0.0000  | 0.2500  | -0.2000 | 0.0000  | 16.0000 |
| 0.0000 |     | 0.5000   | -0.2000 | 15.0000 | 1.0000  | -0.2000 | 10.0000 | 0.0000  |
| 0.3356 | 5 5 | 0.2500   | 0.0000  | 0.0000  | 0.1803  | -0.2000 | 0.0000  | 16.0000 |
| 0.0000 |     | 0.9228   | -0.2000 | 15.0000 | 1.0000  | -0.1178 | 5.6715  | 0.0000  |
| 0.5000 | 1 6 | 0.0000   | 0.0000  | 0.0000  | -0.6528 | -0.3000 | 0.0000  | 36.0000 |
| 0.0000 |     | 10.0663  | -0.3500 | 25.0000 | 1.0000  | -0.1000 | 10.0000 | 0.0000  |
| 0.1186 | 2 6 | 250.0000 | 0.0000  | 0.0000  | -0.7128 | 0.0000  | 1.0000  | 6.0000  |
| 0.0000 |     | 18.5790  | 1.0000  | 0.0000  | 1.0000  | -0.0731 | 7.4983  | 0.0000  |
| 0.7275 | 3 6 | 261.9074 | 5.9533  | 0.0000  | -0.6223 | -0.3000 | 1.0000  | 36.0000 |
| 0.0000 |     | 10.1541  | -0.2366 | 29.7817 | 1.0000  | -0.1083 | 8.5924  | 6.0658  |
| 0.0392 | 6 6 | 70.9120  | 54.0531 | 30.0000 | 0.4931  | -0.3000 | 1.0000  | 16.0000 |
| 0.0000 |     | 0.2476   | -0.8055 | 7.1248  | 1.0000  | -0.1009 | 8.7229  | 0.0000  |
| 0.5000 | 1 7 | 0.0000   | 0.0000  | 0.0000  | -0.6528 | -0.3000 | 0.0000  | 36.0000 |
| 0.0000 |     | 10.0663  | -0.3500 | 25.0000 | 1.0000  | -0.1000 | 10.0000 | 0.0000  |
| 0.1551 | 2 7 | 92.8579  | 0.0000  | 0.0000  | -0.6528 | -0.3000 | 0.0000  | 36.0000 |
| 0.0000 |     | 10.0663  | -0.3500 | 25.0000 | 1.0000  | -0.0842 | 7.1758  | 0.0000  |







|        |                                                               |   |   |         |         |         |         |         |         |        |
|--------|---------------------------------------------------------------|---|---|---------|---------|---------|---------|---------|---------|--------|
| 2.9475 | 2                                                             | 7 | 7 | 78.2279 | 37.6504 | 0.4809  | 0.0000  | 1.0000  | 0.0000  |        |
| 1.0000 | 6                                                             | 3 | 7 | 16.5023 | 0.0100  | 2.7027  | 0.0000  | 1.0000  | 0.0000  |        |
| 2.1060 | 3                                                             | 6 | 7 | 88.2703 | 0.3954  | 0.2500  | 0.0000  | 0.5000  | 0.0000  |        |
| 2.1153 | 3                                                             | 7 | 6 | 83.8306 | 0.3712  | 0.2500  | 0.0000  | 0.5000  | 0.0000  |        |
| 32     | ! Nr of torsions;at1;at2;at3;at4;;V1;V2;V3;V2(B0);vconj;n.u;n |   |   |         |         |         |         |         |         |        |
| 0.0000 | 1                                                             | 1 | 1 | 1       | -0.2500 | 34.7453 | 0.0288  | -6.3507 | -1.6000 | 0.0000 |
| 0.0000 | 1                                                             | 1 | 1 | 2       | -0.2500 | 29.2131 | 0.2945  | -4.9581 | -2.1802 | 0.0000 |
| 0.0000 | 2                                                             | 1 | 1 | 2       | -0.2500 | 31.2081 | 0.4539  | -4.8923 | -2.2677 | 0.0000 |
| 0.0000 | 1                                                             | 1 | 1 | 3       | -0.3495 | 22.2142 | -0.2959 | -2.5000 | -1.9066 | 0.0000 |
| 0.0000 | 2                                                             | 1 | 1 | 3       | 0.0646  | 24.3195 | 0.6259  | -3.9603 | -1.0000 | 0.0000 |
| 0.0000 | 3                                                             | 1 | 1 | 3       | -0.5456 | 5.5756  | 0.8433  | -5.1924 | -1.0180 | 0.0000 |
| 0.0000 | 1                                                             | 1 | 3 | 1       | 1.7555  | 27.9267 | 0.0072  | -2.6533 | -1.0000 | 0.0000 |
| 0.0000 | 1                                                             | 1 | 3 | 2       | -1.4358 | 36.7830 | -1.0000 | -8.1821 | -1.0000 | 0.0000 |
| 0.0000 | 2                                                             | 1 | 3 | 1       | -1.3959 | 34.5053 | 0.7200  | -2.5714 | -2.1641 | 0.0000 |
| 0.0000 | 2                                                             | 1 | 3 | 2       | -2.5000 | 70.0597 | 1.0000  | -3.5539 | -2.9929 | 0.0000 |
| 0.0000 | 1                                                             | 1 | 3 | 3       | 0.6852  | 11.2819 | -0.4784 | -2.5000 | -2.1085 | 0.0000 |
| 0.0000 | 2                                                             | 1 | 3 | 3       | 0.1933  | 80.0000 | 1.0000  | -4.0590 | -3.0000 | 0.0000 |
| 0.0000 | 3                                                             | 1 | 3 | 1       | -1.9889 | 76.4820 | -0.1796 | -3.8301 | -3.0000 | 0.0000 |
| 0.0000 | 3                                                             | 1 | 3 | 2       | 0.2160  | 72.7707 | -0.7087 | -4.2100 | -3.0000 | 0.0000 |
| 0.0000 | 3                                                             | 1 | 3 | 3       | -2.5000 | 71.0772 | 0.2542  | -3.1631 | -3.0000 | 0.0000 |
| 0.0000 | 1                                                             | 3 | 3 | 1       | 2.5000  | -0.6002 | 1.0000  | -3.4297 | -2.8858 | 0.0000 |
| 0.0000 | 1                                                             | 3 | 3 | 2       | -2.5000 | -3.3822 | 0.7004  | -5.4467 | -2.9586 | 0.0000 |
| 0.0000 | 2                                                             | 3 | 3 | 2       | 2.5000  | -4.0000 | 0.9000  | -2.5000 | -1.0000 | 0.0000 |
| 0.0000 | 1                                                             | 3 | 3 | 3       | 1.2329  | -4.0000 | 1.0000  | -2.5000 | -1.7479 | 0.0000 |
| 0.0000 | 2                                                             | 3 | 3 | 3       | 0.8302  | -4.0000 | -0.7763 | -2.5000 | -1.0000 | 0.0000 |
|        | 3                                                             | 3 | 3 | 3       | -2.5000 | -4.0000 | 1.0000  | -2.5000 | -1.0000 | 0.0000 |



|        |                                                  |   |   |         |         |         |         |         |        |
|--------|--------------------------------------------------|---|---|---------|---------|---------|---------|---------|--------|
| 0.0000 |                                                  |   |   |         |         |         |         |         |        |
| 0      | 1                                                | 2 | 0 | 0.0000  | 0.0000  | 0.0000  | 0.0000  | 0.0000  | 0.0000 |
| 0.0000 |                                                  |   |   |         |         |         |         |         |        |
| 0      | 2                                                | 2 | 0 | 0.0000  | 0.0000  | 0.0000  | 0.0000  | 0.0000  | 0.0000 |
| 0.0000 |                                                  |   |   |         |         |         |         |         |        |
| 0      | 2                                                | 3 | 0 | 0.0000  | 0.1000  | 0.0200  | -2.5415 | 0.0000  | 0.0000 |
| 0.0000 |                                                  |   |   |         |         |         |         |         |        |
| 0      | 1                                                | 1 | 0 | 0.0000  | 50.0000 | 0.3000  | -4.0000 | -2.0000 | 0.0000 |
| 0.0000 |                                                  |   |   |         |         |         |         |         |        |
| 0      | 3                                                | 3 | 0 | 0.5511  | 25.4150 | 1.1330  | -5.1903 | -1.0000 | 0.0000 |
| 0.0000 |                                                  |   |   |         |         |         |         |         |        |
| 1      | 1                                                | 3 | 3 | -2.0000 | 73.0530 | 1.5000  | -9.0000 | -2.0000 | 0.0000 |
| 0.0000 |                                                  |   |   |         |         |         |         |         |        |
| 1      | 3                                                | 3 | 1 | 0.0002  | 80.0000 | -1.5000 | -2.5000 | -2.0000 | 0.0000 |
| 0.0000 |                                                  |   |   |         |         |         |         |         |        |
| 3      | 1                                                | 3 | 3 | -1.8835 | 20.0000 | 1.5000  | -9.0000 | -2.0000 | 0.0000 |
| 0.0000 |                                                  |   |   |         |         |         |         |         |        |
| 2      | 6                                                | 6 | 2 | 0.0000  | 0.0000  | 0.0640  | -2.4426 | 0.0000  | 0.0000 |
| 0.0000 |                                                  |   |   |         |         |         |         |         |        |
| 2      | 6                                                | 6 | 6 | 0.0000  | 0.0000  | 0.1587  | -2.4426 | 0.0000  | 0.0000 |
| 0.0000 |                                                  |   |   |         |         |         |         |         |        |
| 0      | 2                                                | 6 | 0 | 0.0000  | 0.0000  | 0.1200  | -2.4847 | 0.0000  | 0.0000 |
| 0.0000 |                                                  |   |   |         |         |         |         |         |        |
| 1      | ! Nr of hydrogen bonds;at1;at2;at3;Rhb;Dehb;vhb1 |   |   |         |         |         |         |         |        |
| 3      | 2                                                | 3 |   | 2.1200  | -3.5800 | 1.4500  | 19.5000 |         |        |
